# Supplementary material
Source: PubMed Central journal article supplement (PMC3726305)
Supplement: NIHMS356186-supplement-Supplement.pdf [file NIHMS356186-supplement-Supplement.pdf]

**Supplemental data**  
**Figure S1**

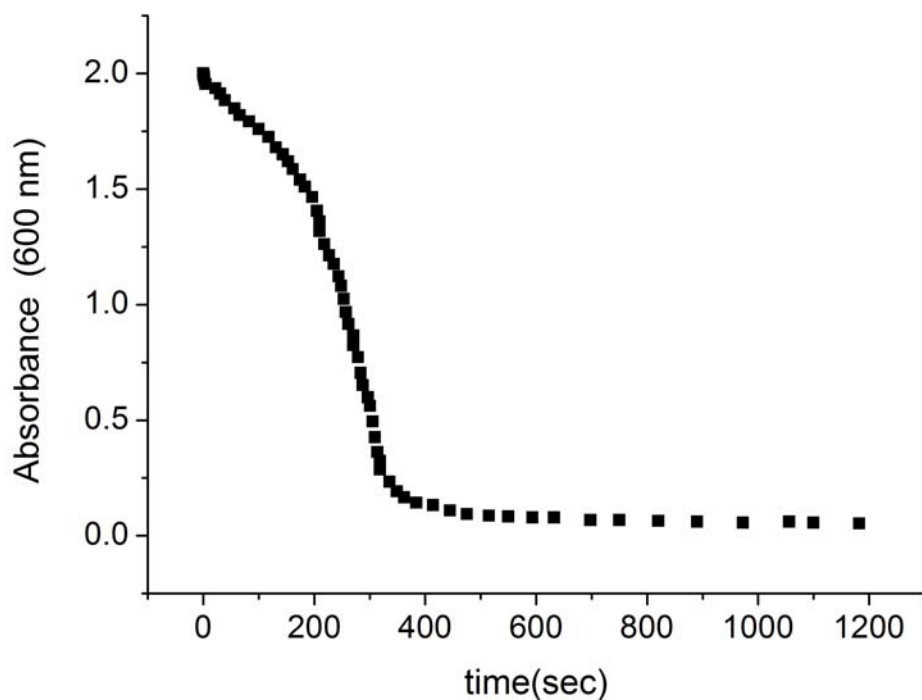

Figure S1. A lipid clearance assay was used to ensure functional lipid-binding properties of the Gd[MTS-ADO3A]apo AI-S55C contrast agent. Lipid-free apolipoprotein were mixed with unilamellar DMPC phospholipid vesicles and the spectral changes (at 600 nm) were monitored over time as phospholipid molecules were used in the formation of smaller protein-lipid complexes with a consequent clearance of the larger DPMC vesicles.
